# Supplementary material for: Inhibition of RhoA and Cdc42 by miR-133a Modulates Retinoic Acid Signalling during Early Development of Posterior Cardiac Tube Segment
Source: MDPI journal article supplement (doi:10.3390/ijms23084179), 2022-04-10
Supplement: s1 [file s1]

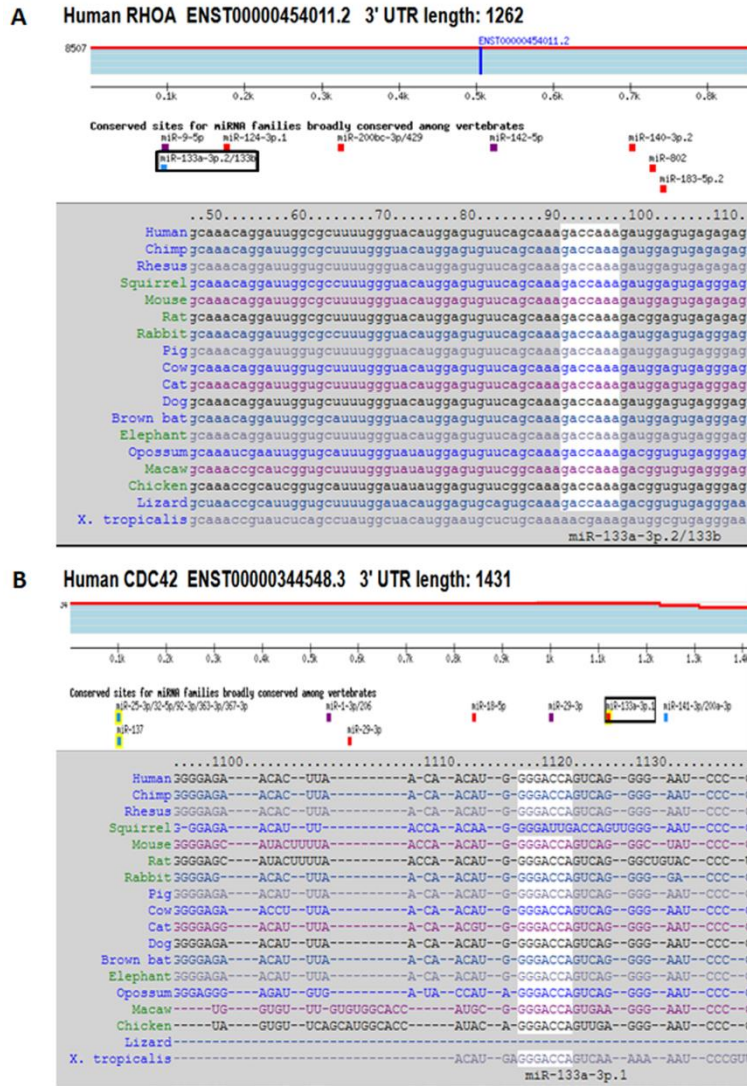

**Supplementary Figure S1.** TargetScan analysis of putative microRNA binding sites in Human RhoA 3' UTR and Cdc42 3' UTR. As can be observed, miR-133a is a putative microRNA targeting Rho A (panel A), and Cdc42 (panel B). Note their binding site are highly conserved along the RhoA and Cdc42 3' UTR in several species, including chicken.

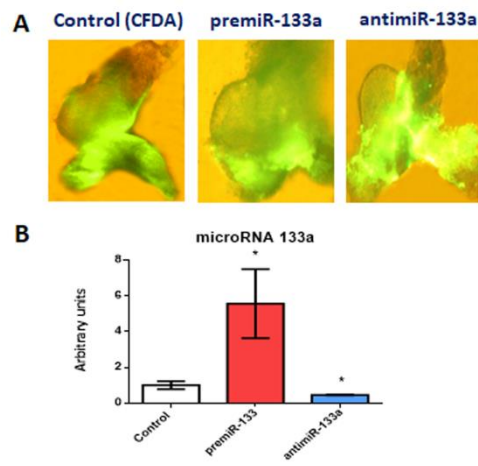

**Supplementary Figure S2.** Panel **A** shows the visualization of CFDA in dissected cardiac *asa* (HH11) from embryos microinjected, either with CFDA, premiR-133a or antimiR-133a, at the level of the posterior cardiac precursors into both primitive endocardial tubes. Panel **B** shows qRT-PCR results validating the miR-133a gain- and loss-of-function respect to control on cardiac *asa*. Student's t-test: \* $p < 0.05$  with respect to control (CFDA) embryos.

| qPCR primers     |               |                         |
|------------------|---------------|-------------------------|
| Gene             | Specie        | Sequence                |
| Tbx5_Foward      | Gallus Gallus | AACCCCTACCCGATCTCCCC    |
| Tbx5_Reverse     | Gallus Gallus | CCATGTAGGGCTTCTTGTAGG G |
| AMHC1_Foward     | Gallus Gallus | AAGACCGGAAGAACATGGTG    |
| AMHC1_Reverse    | Gallus Gallus | GAGACTCAGCCATGTCAGCA    |
| RhoA_Foward      | Gallus Gallus | ATTTCTGTCCCAACGTGCCT    |
| RhoA_Reverse     | Gallus Gallus | CAAAAACCTCCCTCACACCG    |
| Cdc42_Foward     | Gallus Gallus | GCTGTAACAGTGATGATTGGAGG |
| Cdc42_Reverse    | Gallus Gallus | TCTGTGGATAGCTGAGGGGT    |
| Raldh2_Foward    | Gallus Gallus | ACTGAGATTTAAACGGTGGATGA |
| Raldh2_Reverse   | Gallus Gallus | TCTCTTACCATTGCCAGACA    |
| p21_Foward       | Gallus Gallus | AGCCAACACAACAGAAGAGGA   |
| p21_Reverse      | Gallus Gallus | TCCCATGGAGACCGACGATA    |
| Cyclin A_Foward  | Gallus Gallus | TAAGCCTTGCCTCATGGACC    |
| Cyclin A_Reverse | Gallus Gallus | TCTGGTGCGTCAATAAGCGA    |
| Gapdh_Foward     | Gallus Gallus | TGTCCTCTCTGGCAAAGTCC    |
| Gapdh_Reverse    | Gallus Gallus | TGCCCATTGATCACAAGTTT    |

**Supplementary Table S1.** Primer sequences and corresponding genes for qRT-PCR (Gallus gallus).

| 3'UTRs cloning primers |               |                               |
|------------------------|---------------|-------------------------------|
| RhoA_3'UTR_F           | Gallus Gallus | GGACTAGTGAGCCTGTCAAACCTGAGG   |
| RhoA_3'UTR_R           | Gallus Gallus | GGAAGCTTTGCTTGGCCATCTTCCTCT   |
| Cdc42_3'UTR_F          | Gallus Gallus | GGGAAGCTTATTGGAATGAGAGCTGGCCC |
| Cdc42_3'UTR_R          | Gallus Gallus | GGGACTAGTATCCTTGTTGGGCTGGAACC |

**Supplementary Table S2.**  
Primer sequences 3'UTR corresponding RhoA and Cdc42 genes for luciferase assays (Gallus gallus).
